# Supplementary material
Source: PubMed Central journal article supplement (PMC4190834)
Supplement: NIHMS485711-supplement-1.pdf [file NIHMS485711-supplement-1.pdf]

## **ONLINE SUPPLEMENT**

Profiles of the National Institutes of Health Stroke Scale Items as a Predictor of Patient Outcome

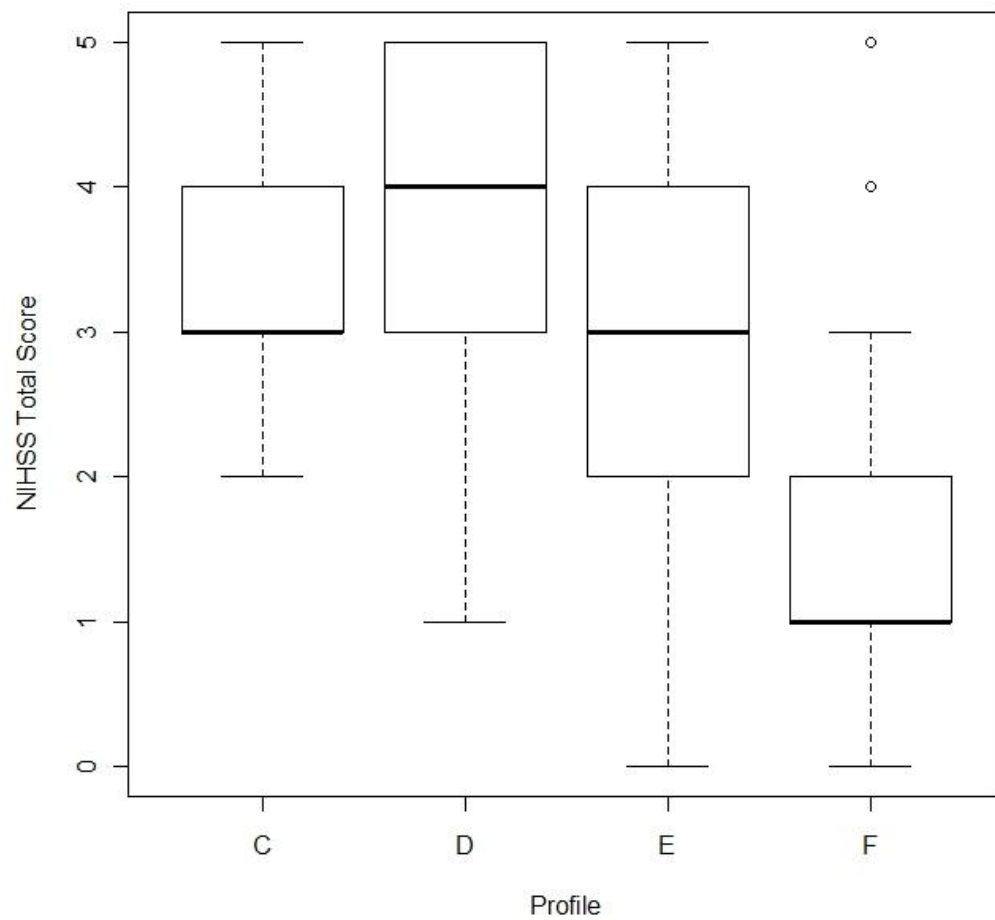

Figure S1. Boxplots of NIHSS total score by profile among 2005 mild strokes defined by NIHSS total score  $\leq 5$

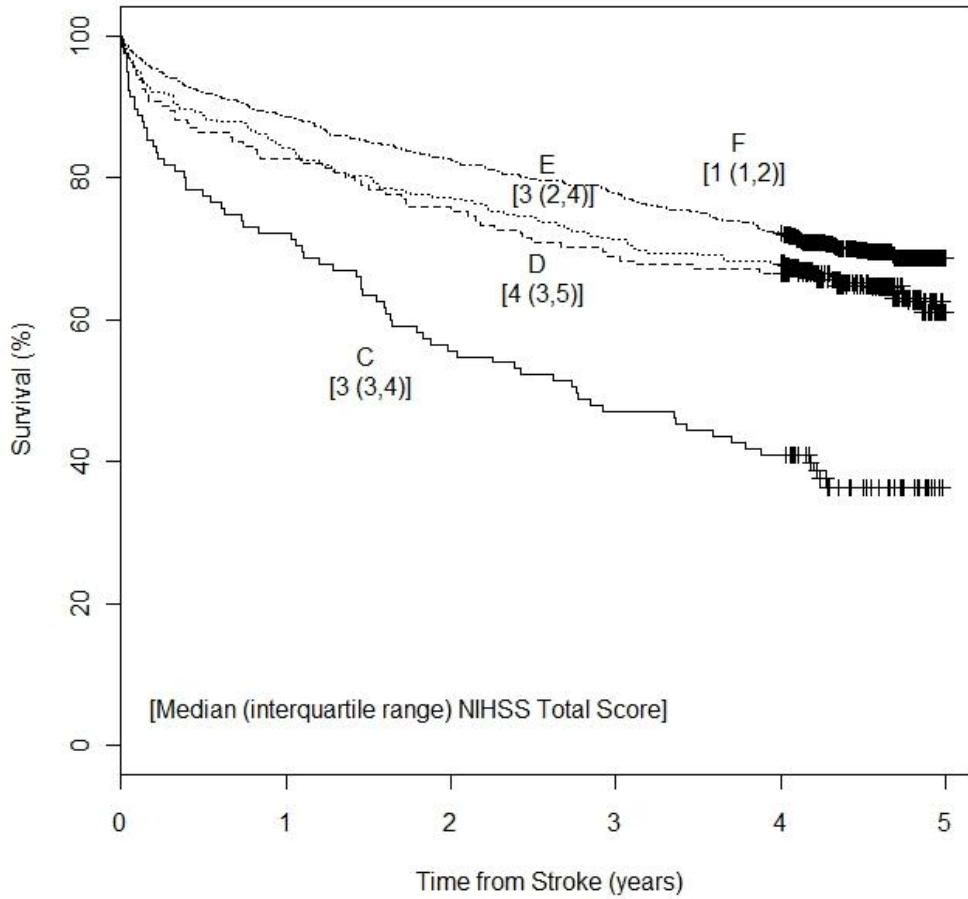

Figure S2. Kaplan-Meier curves by profile among 2005 mild strokes defined by NIHSS total score  $\leq 5$

Table S1. Outcome measures for 2005 mild strokes (n=1362)

| Profile   | Discharge Rankin $\leq$ 1 or<br>back to baseline |      |              | 30 day mortality |      |              | 90 day mortality |      |              | Survival       |      |              |
|-----------|--------------------------------------------------|------|--------------|------------------|------|--------------|------------------|------|--------------|----------------|------|--------------|
|           | # of<br>events                                   | OR   | 95% CI       | # of<br>events   | OR   | 95% CI       | # of<br>events   | OR   | 95% CI       | # of<br>events | HR   | 95% CI       |
| C (n=115) | 31                                               | Ref  | -            | 11               | Ref  | -            | 20               | Ref  | -            | 72             | Ref  | -            |
| D (n=161) | 44                                               | 1.11 | (0.64, 1.95) | 8                | 0.84 | (0.31, 2.27) | 16               | 0.83 | (0.39, 1.77) | 57             | 0.75 | (0.53, 1.07) |
| E (n=330) | 136                                              | 1.73 | (1.06, 2.81) | 15               | 0.68 | (0.29, 1.59) | 26               | 0.59 | (0.30, 1.14) | 117            | 0.71 | (0.52, 0.96) |
| F (n=756) | 384                                              | 1.63 | (1.00, 2.66) | 20               | 0.51 | (0.21, 1.28) | 39               | 0.49 | (0.24, 0.97) | 228            | 0.64 | (0.47, 0.86) |
| P-value   |                                                  |      | 0.049        |                  |      | 0.53         |                  |      | 0.18         |                |      | 0.03         |

Adjusted for age, gender, race, pre stroke modified Rankin, and rNIHSS total score.

OR indicates odds ratio; CI, confidence interval; HR, hazard ratio.

Table S2. Demographics and stroke risk factors of the ischemic strokes from 1999, overall and by profile

| Characteristic                   | 1999                 | Profile      |              |              |              |              |              | p-value |
|----------------------------------|----------------------|--------------|--------------|--------------|--------------|--------------|--------------|---------|
|                                  | IS Cases<br>(N=2277) | A<br>(n=270) | B<br>(n=252) | C<br>(n=202) | D<br>(n=430) | E<br>(n=536) | F<br>(n=587) |         |
| Age, median (IQR)                | 74 (65, 82)          | 77 (69, 85)  | 77 (68, 84)  | 78 (69, 85)  | 75 (65, 82)  | 72 (62, 80)  | 72 (62, 80)  | <0.01   |
| Race (black)                     | 400 (18%)            | 40 (15%)     | 54 (21%)     | 30 (15%)     | 85 (20%)     | 94 (18%)     | 97 (17%)     | 0.23    |
| Gender (female)                  | 1262 (55%)           | 175 (65%)    | 161 (64%)    | 120 (59%)    | 217 (50%)    | 284 (53%)    | 305 (52%)    | <0.01   |
| Pre-stroke Rankin, median (IQR)  | 1 (0, 4)             | 3 (0, 4)     | 2 (0, 4)     | 3 (0, 4)     | 0 (0, 4)     | 0 (0, 3)     | 0 (0, 2)     | <0.01   |
| Hypertension                     | 1612 (71%)           | 193 (71%)    | 171 (68%)    | 130 (64%)    | 312 (73%)    | 382 (71%)    | 424 (72%)    | 0.26    |
| Diabetes                         | 750 (33%)            | 80 (30%)     | 82 (33%)     | 59 (29%)     | 140 (33%)    | 187 (35%)    | 202 (34%)    | 0.53    |
| Current smoking                  | 483 (22%)            | 37 (15%)     | 55 (23%)     | 31 (16%)     | 107 (26%)    | 123 (24%)    | 130 (23%)    | 0.01    |
| Atrial fibrillation              | 419 (18%)            | 83 (31%)     | 77 (31%)     | 42 (21%)     | 51 (12%)     | 81 (15%)     | 85 (15%)     | <0.01   |
| CAD                              | 843 (37%)            | 109 (40%)    | 107 (43%)    | 81 (40%)     | 150 (35%)    | 198 (37%)    | 198 (34%)    | 0.12    |
| CHF                              | 410 (18%)            | 70 (26%)     | 66 (26%)     | 48 (24%)     | 56 (13%)     | 86 (16%)     | 84 (14%)     | <0.01   |
| Prior stroke                     | 613 (27%)            | 94 (35%)     | 62 (25%)     | 49 (24%)     | 129 (30%)    | 153 (29%)    | 126 (21%)    | <0.01   |
| rNIHSS total score, median (IQR) | 4 (2, 7)             | 14 (10, 17)  | 9 (7, 11)    | 5 (4, 7)     | 4.5 (3, 6)   | 3 (3, 4)     | 2 (1, 2)     | <0.01   |

IQR indicates interquartile range; CAD, coronary artery disease; CHF, congestive heart failure; rNIHSS, retrospective National Institutes of Health Stroke Scale.

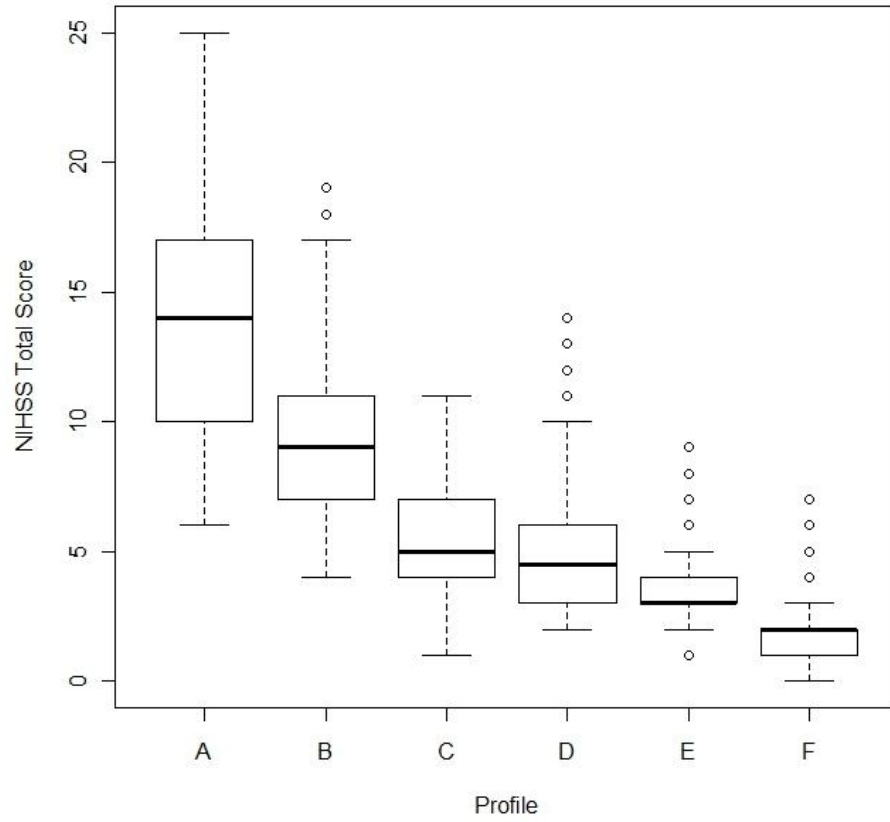

Figure S3. Boxplots of NIHSS total score by profile for 1999 IS cases

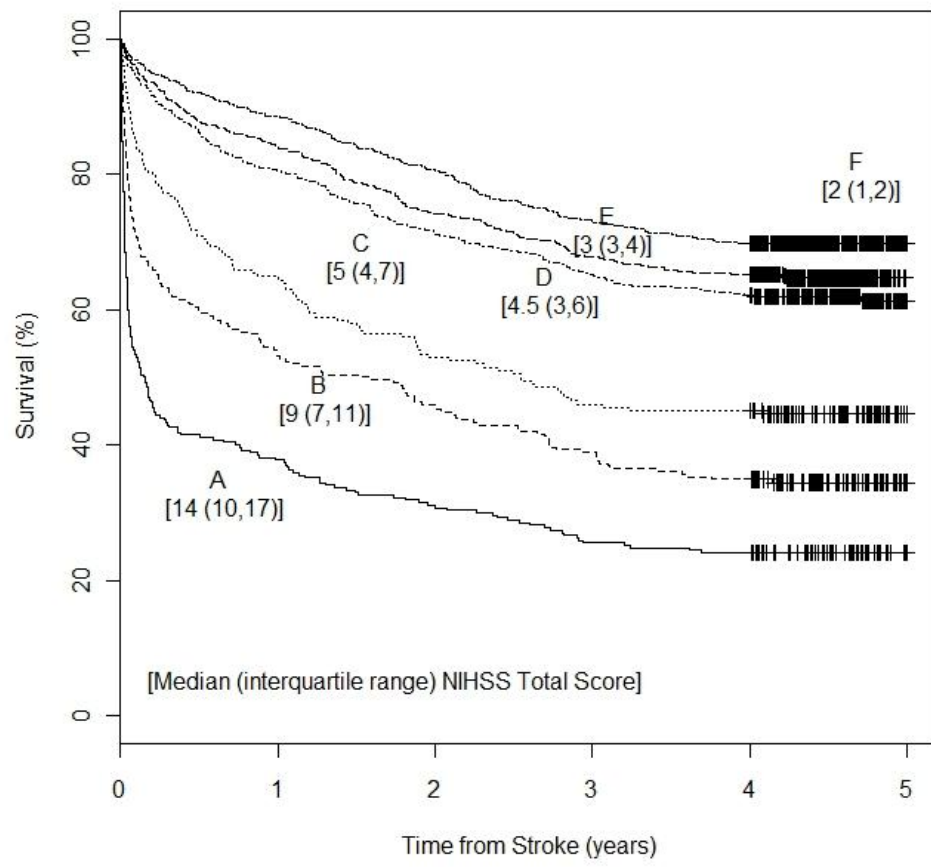

Figure S4. Kaplan-Meier curves by profile for 1999 IS cases

Table S3. Outcome measures by NIHSS item profile for 1999 IS cases (n=2277)

| Profile   | Discharge Rankin $\leq$ 1 or<br>back to baseline |       |             | 30 day mortality |       |            | 90 day mortality |       |            | Survival       |       |            |
|-----------|--------------------------------------------------|-------|-------------|------------------|-------|------------|------------------|-------|------------|----------------|-------|------------|
|           | # of<br>events                                   | OR    | 95% CI      | # of<br>events   | OR    | 95% CI     | # of<br>events   | OR    | 95% CI     | # of<br>events | HR    | 95% CI     |
| A (n=270) | 47                                               | Ref   | -           | 123              | Ref   | -          | 150              | Ref   | -          | 205            | Ref   | -          |
| B (n=252) | 57                                               | 1.40  | 0.87, 2.25  | 70               | 0.48  | 0.33, 0.70 | 90               | 0.45  | 0.31, 0.65 | 165            | 0.67  | 0.54, 0.82 |
| C (n=202) | 79                                               | 3.09  | 1.93, 4.95  | 28               | 0.19* | 0.12, 0.30 | 44               | 0.20* | 0.13, 0.31 | 112            | 0.44* | 0.35, 0.55 |
| D (n=430) | 158                                              | 3.27  | 2.15, 4.97  | 21               | 0.07* | 0.04, 0.11 | 42               | 0.09* | 0.06, 0.14 | 165            | 0.29* | 0.24, 0.36 |
| E (n=536) | 231                                              | 4.48  | 2.98, 6.75  | 21               | 0.06  | 0.03, 0.10 | 40               | 0.08  | 0.05, 0.11 | 189            | 0.29  | 0.24, 0.35 |
| F (n=587) | 344                                              | 10.09 | 6.66, 15.29 | 18               | 0.05  | 0.03, 0.08 | 31               | 0.05  | 0.03, 0.08 | 178            | 0.25  | 0.20, 0.30 |
| P-value   |                                                  |       | <0.0001     |                  |       | <0.0001    |                  |       | <0.0001    |                |       | <0.0001    |

Adjusted for age, gender, race, and pre stroke modified Rankin.

OR indicates odds ratio; CI, confidence interval; HR, hazard ratio.

\*Profiles C and D significantly different with p-value < 0.05.
